# Supplementary material for: Pulmonary disease caused by a newly identified mycobacterium: Mycolicibacterium toneyamachuris: a case report
Source: Springer Nature journal article supplement (doi:10.1186/s12879-020-05626-y), 2020-11-25

Supplementary Figure 1. Whole genomic comparison of *M. toneyamachuris* and *M. mucogenicum* group. A) Mutual similarity using average nucleotide identity. B) Phylogenetic tree generated by core genome consisting of 455 genes.

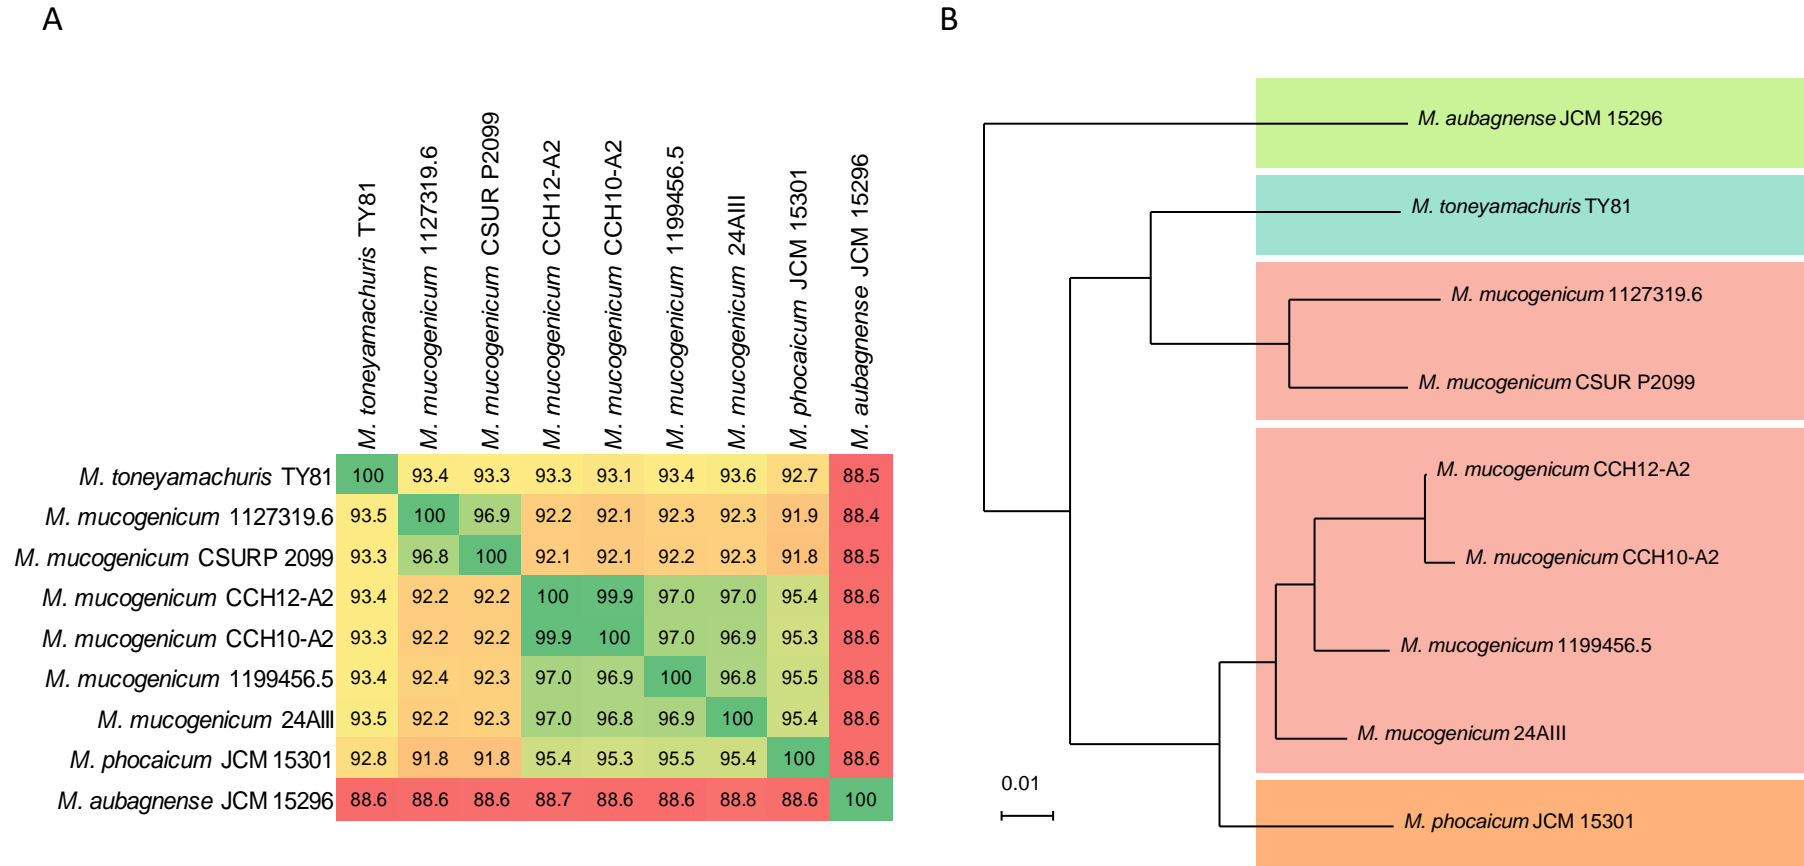

Supplementary Figure 2. The colony formation of TY81 on Tryptic Soy Agar at 30 ° C at day 7.  
Scale bar indicates 2 mm.

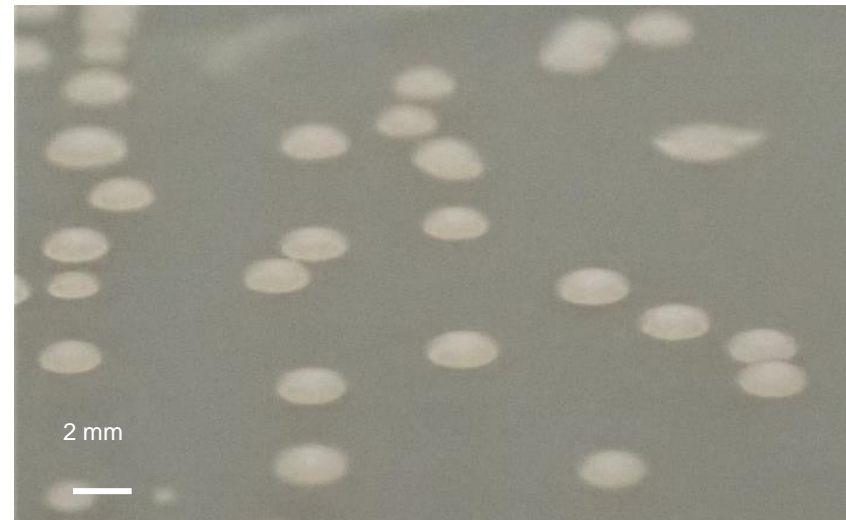

Supplement: MOESM1 [file 18625594]
